# Supplementary material
Source: PubMed Central journal article supplement (PMC7017894)
Supplement: attr-55-02-12_s01.pdf [file attr-55-02-12_s01.pdf]

**Supplemental Table. Detailed Quality Appraisal for the 46 Studies**

| Study                                 | Question |   |   |    |   |   |   |    |    |    | Reporting (n/8) | Question |    |    | External Validity (n/2) |
|---------------------------------------|----------|---|---|----|---|---|---|----|----|----|-----------------|----------|----|----|-------------------------|
|                                       | 1        | 2 | 3 | 4  | 5 | 6 | 7 | 8  | 9  | 10 |                 | 11       | 12 | 13 |                         |
| Pearce et al <sup>1</sup> (2018)      | 1        | 1 | 1 | NA | 2 | 1 | 1 | NA | NA | 1  | 8               | 0        | 0  | NA | 0                       |
| Clark et al <sup>2</sup> (2018)       | 1        | 1 | 1 | NA | 0 | 1 | 1 | NA | NA | 1  | 6               | 1        | 1  | NA | 2                       |
| Lewis et al <sup>3</sup> (2017)       | 1        | 1 | 1 | NA | 0 | 1 | 1 | NA | NA | 1  | 6               | 0        | 0  | 1  | 1                       |
| Esopenko et al <sup>4</sup> (2017)    | 1        | 1 | 1 | NA | 2 | 1 | 1 | NA | NA | 1  | 8               | 1        | 1  | NA | 2                       |
| Gardner et al <sup>5</sup> (2017)     | 1        | 1 | 1 | NA | 1 | 1 | 1 | NA | NA | 1  | 7               | 1        | 1  | NA | 2                       |
| Deshpande et al <sup>6</sup> (2017)   | 1        | 1 | 1 | NA | 0 | 1 | 1 | NA | NA | 1  | 6               | 1        | 1  | NA | 2                       |
| Kuhn et al <sup>7</sup> (2017)        | 1        | 1 | 1 | NA | 1 | 1 | 1 | NA | NA | 1  | 7               | 1        | 1  | NA | 2                       |
| Montenigro et al <sup>8</sup> (2017)  | 1        | 1 | 1 | NA | 0 | 1 | 1 | NA | NA | 1  | 6               | 0        | 0  | NA | 0                       |
| Strain et al <sup>9</sup> (2017)      | 0        | 1 | 1 | NA | 1 | 0 | 1 | NA | NA | 1  | 5               | 1        | 1  | NA | 2                       |
| McMillan et al <sup>10</sup> (2017)   | 0        | 0 | 0 | NA | 0 | 1 | 1 | NA | NA | 1  | 3               | 0        | 0  | NA | 0                       |
| Alosco et al <sup>11</sup> (2017)     | 1        | 1 | 1 | NA | 0 | 1 | 1 | NA | NA | 1  | 6               | 0        | 0  | NA | 0                       |
| Solomon et al <sup>12</sup> (2016)    | 1        | 1 | 1 | NA | 1 | 1 | 1 | NA | NA | 1  | 7               | 1        | 1  | NA | 2                       |
| Multani et al <sup>13</sup> (2016)    | 1        | 1 | 1 | NA | 1 | 1 | 1 | NA | NA | 1  | 7               | 0        | 0  | NA | 0                       |
| Koerte et al <sup>14</sup> (2016)     | 1        | 1 | 1 | NA | 0 | 1 | 1 | NA | NA | 1  | 6               | 1        | 1  | NA | 2                       |
| Gardner et al <sup>15</sup> (2016)    | 1        | 1 | 1 | NA | 1 | 1 | 1 | NA | NA | 0  | 6               | 0        | 0  | NA | 0                       |
| Wright et al <sup>16</sup> (2016)     | 1        | 1 | 1 | NA | 2 | 1 | 1 | NA | NA | 1  | 8               | 1        | 1  | NA | 2                       |
| Wilde et al <sup>17</sup> (2016)      | 1        | 1 | 1 | NA | 0 | 1 | 1 | NA | NA | 1  | 6               | 0        | 0  | NA | 0                       |
| Amen et al <sup>18</sup> (2016)       | 1        | 1 | 0 | NA | 1 | 0 | 0 | NA | NA | 1  | 4               | 0        | 0  | NA | 0                       |
| Hume et al <sup>19</sup> (2017)       | 1        | 1 | 1 | NA | 1 | 1 | 1 | NA | NA | 1  | 7               | 0        | 0  | NA | 0                       |
| Vann Jones et al <sup>20</sup> (2014) | 1        | 1 | 0 | NA | 0 | 0 | 1 | NA | NA | 1  | 4               | 1        | 1  | NA | 2                       |

|                                     |    |    |    |    |    |    |                                |   |    |    |    |    |    |          |    |    |                                                      |   |    |             |              |
|-------------------------------------|----|----|----|----|----|----|--------------------------------|---|----|----|----|----|----|----------|----|----|------------------------------------------------------|---|----|-------------|--------------|
| Decq et al <sup>21</sup> (2016)     | 1  | 1  | 1  | NA |    | 1  | 1                              | 1 | NA | NA | 1  | 7  | 1  | 1        | NA | 2  |                                                      |   |    |             |              |
| Koerte et al <sup>22</sup> (2016)   | 1  | 1  | 0  | NA |    | 0  | 1                              | 1 | NA | NA | 1  | 5  | 0  | 0        | NA | 0  |                                                      |   |    |             |              |
| Meehan et al <sup>23</sup> (2016)   | 1  | 1  | 1  | NA |    | 2  | 1                              | 1 | NA | NA | 1  | 8  | 1  | 1        | NA | 2  |                                                      |   |    |             |              |
| Coughlin et al <sup>24</sup> (2015) | 1  | 1  | 1  | NA |    | 1  | 1                              | 1 | NA | NA | 1  | 7  | 1  | 1        | NA | 2  |                                                      |   |    |             |              |
| Stamm et al <sup>25</sup> (2015)    | 1  | 1  | 1  | NA |    | 1  | 1                              | 1 | NA | NA | 1  | 7  | 0  | 0        | NA | 0  |                                                      |   |    |             |              |
| Koerte et al <sup>26</sup> (2015)   | 1  | 1  | 1  | NA |    | 1  | 1                              | 1 | NA | NA | 1  | 7  | 1  | 1        | NA | 2  |                                                      |   |    |             |              |
| Strain et al <sup>27</sup> (2015)   | 1  | 1  | 1  | NA |    | 2  | 1                              | 1 | NA | NA | 1  | 8  | 1  | 1        | NA | 2  |                                                      |   |    |             |              |
| Question                            |    |    |    |    |    |    | Question                       |   |    |    |    |    |    | Question |    |    |                                                      |   |    |             |              |
| 14                                  | 15 | 16 | 17 | 18 | 19 | 20 | Internal Validity (Bias) (n/4) |   |    |    | 21 | 22 | 23 | 24       | 25 | 26 | Internal Validity-Confounding (Selection Bias) (n/3) |   | 27 | Power (n/1) | Total (n/18) |
| NA                                  | NA | 0  | 0  | 1  | NA | 1  | 2                              | 0 | 0  | NA | NA | 1  | NA | 1        | 0  | NA | 1                                                    | 0 | 0  | 11          |              |
| NA                                  | NA | 0  | 0  | 1  | NA | 1  | 2                              | 0 | 1  | NA | NA | 0  | NA | 1        | 0  | NA | 1                                                    | 0 | 0  | 11          |              |
| NA                                  | NA | 0  | 0  | 1  | NA | 1  | 2                              | 0 | 0  | NA | NA | 0  | NA | 0        | 0  | NA | 0                                                    | 0 | 0  | 9           |              |
| NA                                  | NA | 0  | 0  | 1  | NA | 1  | 2                              | 0 | 0  | NA | NA | 0  | NA | 0        | 0  | NA | 0                                                    | 0 | 0  | 12          |              |
| NA                                  | NA | 0  | 0  | 1  | NA | 1  | 2                              | 0 | 0  | NA | NA | 0  | NA | 0        | 0  | NA | 0                                                    | 0 | 0  | 11          |              |
| NA                                  | NA | 0  | 1  | 1  | NA | 1  | 3                              | 1 | 1  | NA | NA | 1  | NA | 3        | 0  | NA | 3                                                    | 0 | 0  | 14          |              |
| NA                                  | NA | 0  | 0  | 1  | NA | 1  | 2                              | 1 | 1  | NA | NA | 1  | NA | 3        | 0  | NA | 3                                                    | 0 | 0  | 14          |              |
| NA                                  | NA | 0  | 0  | 1  | NA | 1  | 2                              | 1 | 1  | NA | NA | 0  | NA | 2        | 0  | NA | 2                                                    | 0 | 0  | 10          |              |
| NA                                  | NA | 0  | 0  | 1  | NA | 1  | 2                              | 0 | 0  | NA | NA | 0  | NA | 0        | 0  | NA | 0                                                    | 0 | 0  | 9           |              |
| NA                                  | NA | 0  | 0  | 1  | NA | 0  | 1                              | 0 | 0  | NA | NA | 0  | NA | 0        | 0  | NA | 0                                                    | 0 | 0  | 4           |              |
| NA                                  | NA | 0  | 0  | 1  | NA | 1  | 2                              | 0 | 0  | NA | NA | 0  | NA | 0        | 0  | NA | 0                                                    | 0 | 0  | 8           |              |
| NA                                  | NA | 0  | 0  | 1  | NA | 1  | 2                              | 1 | 1  | NA | NA | 0  | NA | 2        | 0  | NA | 2                                                    | 0 | 0  | 13          |              |
| NA                                  | NA | 0  | 0  | 1  | NA | 1  | 2                              | 0 | 0  | NA | NA | 0  | NA | 0        | 0  | NA | 0                                                    | 0 | 0  | 9           |              |
| NA                                  | NA | 0  | 0  | 1  | NA | 1  | 2                              | 1 | 0  | NA | NA | 0  | NA | 1        | 0  | NA | 1                                                    | 0 | 0  | 11          |              |

|    |    |   |   |   |    |   |   |   |   |    |    |   |    |   |   |   |    |
|----|----|---|---|---|----|---|---|---|---|----|----|---|----|---|---|---|----|
| NA | NA | 0 | 0 | 1 | NA | 1 | 2 | 1 | 0 | NA | NA | 0 | NA | 1 | 0 | 0 | 9  |
| NA | NA | 1 | 0 | 1 | NA | 1 | 3 | 1 | 1 | NA | NA | 0 | NA | 2 | 0 | 0 | 15 |
| NA | NA | 0 | 0 | 1 | NA | 1 | 2 | 0 | 0 | NA | NA | 0 | NA | 0 | 0 | 0 | 8  |
| NA | NA | 0 | 0 | 1 | NA | 1 | 2 | 0 | 0 | NA | NA | 1 | NA | 1 | 0 | 0 | 7  |
| NA | NA | 0 | 0 | 1 | NA | 1 | 2 | 1 | 1 | NA | NA | 0 | NA | 2 | 0 | 0 | 11 |
| NA | NA | 0 | 0 | 1 | NA | 1 | 2 | 1 | 1 | NA | NA | 0 | NA | 2 | 0 | 0 | 10 |
| NA | NA | 0 | 0 | 1 | NA | 1 | 2 | 1 | 1 | NA | NA | 0 | NA | 2 | 0 | 0 | 13 |
| NA | NA | 0 | 0 | 1 | NA | 1 | 2 | 0 | 0 | NA | NA | 0 | NA | 0 | 0 | 0 | 7  |
| NA | NA | 0 | 0 | 1 | NA | 1 | 2 | 1 | 1 | NA | NA | 0 | NA | 2 | 0 | 0 | 14 |
| NA | NA | 0 | 0 | 1 | NA | 1 | 2 | 1 | 1 | NA | NA | 0 | NA | 2 | 0 | 0 | 13 |
| NA | NA | 0 | 0 | 1 | NA | 1 | 2 | 1 | 1 | NA | NA | 0 | NA | 2 | 0 | 0 | 11 |
| NA | NA | 0 | 0 | 1 | NA | 1 | 2 | 0 | 0 | NA | NA | 0 | NA | 0 | 0 | 0 | 11 |
| NA | NA | 0 | 0 | 1 | NA | 1 | 2 | 1 | 1 | NA | NA | 1 | NA | 3 | 0 | 0 | 15 |

|                                       | Question |   |   |    |   |   |   |    |    |    | Reporting (n/8) |    |    | Question |   |  | External Validity (n/2) |
|---------------------------------------|----------|---|---|----|---|---|---|----|----|----|-----------------|----|----|----------|---|--|-------------------------|
| Study                                 | 1        | 2 | 3 | 4  | 5 | 6 | 7 | 8  | 9  | 10 | 11              | 12 | 13 |          |   |  |                         |
| Terry et al <sup>28</sup> (2015)      | 1        | 1 | 1 | NA | 2 | 1 | 1 | NA | NA | 1  | 8               | 1  | 1  | NA       | 2 |  |                         |
| Casson et al <sup>29</sup> (2014)     | 1        | 1 | 1 | NA | 1 | 1 | 1 | NA | NA | 1  | 7               | 1  | 1  | NA       | 2 |  |                         |
| Tremblay et al <sup>30</sup> (2014)   | 0        | 1 | 0 | NA | 1 | 1 | 1 | NA | NA | 1  | 5               | 0  | 0  | NA       | 0 |  |                         |
| Hart et al <sup>31</sup> (2013)       | 1        | 1 | 1 | NA | 1 | 1 | 1 | NA | NA | 1  | 7               | 1  | 1  | NA       | 2 |  |                         |
| Hampshire et al <sup>32</sup> (2013)  | 1        | 1 | 0 | NA | 0 | 0 | 0 | NA | NA | 1  | 3               | 0  | 0  | NA       | 0 |  |                         |
| Pearce et al <sup>33</sup> (2014)     | 1        | 1 | 1 | NA | 1 | 1 | 1 | NA | NA | 1  | 7               | 0  | 0  | NA       | 0 |  |                         |
| Seichepine et al <sup>34</sup> (2013) | 1        | 1 | 1 | NA | 0 | 1 | 1 | NA | NA | 0  | 5               | 0  | 0  | NA       | 0 |  |                         |
| Randolph et al <sup>35</sup> (2013)   | 0        | 0 | 0 | NA | 0 | 0 | 1 | NA | NA | 0  | 1               | 0  | 0  | NA       | 0 |  |                         |

|                                           |   |   |   |    |   |   |   |    |    |   |   |   |   |    |   |
|-------------------------------------------|---|---|---|----|---|---|---|----|----|---|---|---|---|----|---|
| Tremblay et al <sup>36</sup> (2013)       | 1 | 1 | 1 | NA | 1 | 1 | 1 | NA | NA | 1 | 7 | 0 | 0 | NA | 0 |
| Ford et al <sup>37</sup> (2013)           | 1 | 1 | 1 | NA | 1 | 1 | 1 | NA | NA | 1 | 7 | 1 | 1 | NA | 2 |
| Willeumier et al <sup>38</sup> (2012)     | 1 | 1 | 1 | NA | 1 | 1 | 1 | NA | NA | 1 | 7 | 1 | 1 | NA | 2 |
| Amen et al <sup>39</sup> (2011)           | 1 | 1 | 1 | NA | 1 | 1 | 1 | NA | NA | 0 | 6 | 1 | 1 | NA | 2 |
| Hinton et al <sup>40</sup> (2011)         | 1 | 1 | 1 | NA | 1 | 1 | 1 | NA | NA | 1 | 7 | 1 | 1 | NA | 2 |
| De Beaumont et al <sup>41</sup> (2009)    | 1 | 1 | 1 | NA | 1 | 1 | 1 | NA | NA | 0 | 6 | 0 | 0 | NA | 0 |
| Thornton et al <sup>42</sup> (2008)       | 0 | 1 | 1 | NA | 1 | 1 | 1 | NA | NA | 1 | 6 | 1 | 1 | NA | 2 |
| Guskiewicz et al <sup>43</sup> (2005)     | 1 | 1 | 0 | NA | 1 | 1 | 1 | NA | NA | 1 | 6 | 0 | 0 | NA | 0 |
| Downs and Abwender <sup>44</sup> (2002)   | 1 | 1 | 0 | NA | 0 | 1 | 1 | NA | NA | 0 | 4 | 0 | 0 | NA | 0 |
| Murelius and Haglund <sup>45</sup> (1991) | 0 | 1 | 0 | NA | 0 | 0 | 1 | NA | NA | 0 | 2 | 0 | 0 | NA | 0 |
| Casson et al <sup>46</sup> (1984)         | 1 | 1 | 1 | NA | 1 | 1 | 0 | NA | NA | 0 | 5 | 0 | 0 | NA | 0 |

Abbreviation: NA, not applicable.

| Question |    |    |    |    |    |    | Question                          |    |    |    |    |    |    | Question                                                | Power | Total |        |
|----------|----|----|----|----|----|----|-----------------------------------|----|----|----|----|----|----|---------------------------------------------------------|-------|-------|--------|
| 14       | 15 | 16 | 17 | 18 | 19 | 20 | Internal Validity<br>(Bias) (n/4) | 21 | 22 | 23 | 24 | 25 | 26 | Internal Validity-Confounding<br>(Selection Bias) (n/3) | 27    | (n/1) | (n/18) |
| NA       | NA | 0  | 0  | 1  | NA | 1  | 2                                 | 1  | 1  | NA | NA | 1  | NA | 3                                                       | 0     | 0     | 15     |
| NA       | NA | 0  | 0  | 1  | NA | 1  | 2                                 | 1  | 0  | NA | NA | 0  | NA | 1                                                       | 0     | 0     | 12     |
| NA       | NA | 0  | 0  | 1  | NA | 1  | 2                                 | 1  | 0  | NA | NA | 0  | NA | 1                                                       | 0     | 0     | 8      |
| NA       | NA | 0  | 0  | 1  | NA | 1  | 2                                 | 1  | 1  | NA | NA | 0  | NA | 2                                                       | 0     | 0     | 13     |
| NA       | NA | 0  | 0  | 1  | NA | 1  | 2                                 | 0  | 0  | NA | NA | 0  | NA | 0                                                       | 0     | 0     | 5      |
| NA       | NA | 0  | 0  | 1  | NA | 1  | 2                                 | 0  | 0  | NA | NA | 0  | NA | 0                                                       | 0     | 0     | 9      |
| NA       | NA | 0  | 0  | 1  | NA | 1  | 2                                 | 1  | 0  | NA | NA | 0  | NA | 1                                                       | 0     | 0     | 8      |
| NA       | NA | 0  | 0  | 1  | NA | 1  | 2                                 | 0  | 0  | NA | NA | 0  | NA | 0                                                       | 0     | 0     | 3      |

|    |    |   |   |   |    |   |   |   |   |    |    |   |    |   |   |   |    |
|----|----|---|---|---|----|---|---|---|---|----|----|---|----|---|---|---|----|
| NA | NA | 0 | 0 | 1 | NA | 1 | 2 | 0 | 0 | NA | NA | 0 | NA | 0 | 0 | 0 | 9  |
| NA | NA | 0 | 0 | 1 | NA | 1 | 2 | 0 | 0 | NA | NA | 0 | NA | 0 | 0 | 0 | 11 |
| NA | NA | 0 | 0 | 1 | NA | 1 | 2 | 1 | 0 | NA | NA | 0 | NA | 1 | 0 | 0 | 12 |
| NA | NA | 0 | 0 | 1 | NA | 1 | 2 | 0 | 0 | NA | NA | 1 | NA | 1 | 0 | 0 | 11 |
| NA | NA | 0 | 0 | 1 | NA | 1 | 2 | 1 | 1 | NA | NA | 1 | NA | 3 | 0 | 0 | 14 |
| NA | NA | 0 | 0 | 1 | NA | 1 | 2 | 1 | 0 | NA | NA | 0 | NA | 1 | 0 | 0 | 9  |
| NA | NA | 0 | 0 | 1 | NA | 1 | 2 | 1 | 1 | NA | NA | 0 | NA | 2 | 0 | 0 | 12 |
| NA | NA | 0 | 0 | 1 | NA | 1 | 2 | 0 | 1 | NA | NA | 0 | NA | 1 | 0 | 0 | 9  |
| NA | NA | 0 | 0 | 1 | NA | 1 | 2 | 1 | 1 | NA | NA | 0 | NA | 2 | 1 | 1 | 9  |
| NA | NA | 0 | 0 | 1 | NA | 1 | 2 | 1 | 1 | NA | NA | 0 | NA | 2 | 0 | 0 | 6  |
| NA | NA | 0 | 0 | 1 | NA | 1 | 2 | 0 | 0 | NA | NA | 0 | NA | 0 | 0 | 0 | 7  |

## REFERENCES

1. Pearce AJ, Rist B, Fraser CL, Cohen A, Maller JJ. Neurophysiological and cognitive impairment following repeated sports concussion injuries in retired professional rugby league players. *Brain Inj.* 2018;32(4):498–505.
2. Clark MD, Varangis EML, Champagne AA, et al. Effects of career duration, concussion history, and playing position on white matter microstructure and functional neural recruitment in former college and professional football athletes. *Radiology.* 2018;286(3):967–977.
3. Lewis GN, Hume PA, Stavric V, Brown SR, Taylor D. New Zealand rugby health study: motor cortex excitability in retired elite and community level rugby players. *N Z Med J.* 2017;130(1448):34–44.
4. Esopenko C, Chow TW, Tartaglia MC, et al. Cognitive and psychosocial function in retired professional hockey players. *J Neurol Neurosurg Psychiatry.* 2017;88(6):512–519.
5. Gardner AJ, Iverson GL, Wojtowicz M, et al. MR spectroscopy findings in retired professional rugby league players. *Int J Sports Med.* 2017;38(3):241–252.
6. Deshpande SK, Hasegawa RB, Rabinowitz AR, et al. Association of playing high school football with cognition and mental health later in life. *JAMA Neurol.* 2017;74(8):909–918.
7. Kuhn AW, Zuckerman SL, Solomon GS, Casson IR, Viano DC. Interrelationships among neuroimaging biomarkers, neuropsychological test data, and symptom reporting in a cohort of retired National Football League players. *Sports Health.* 2017;9(1):30–40.
8. Montenigro PH, Alosco ML, Martin BM, et al. Cumulative head impact exposure predicts later-life depression, apathy, executive dysfunction, and cognitive impairment in former high school and college football players. *J Neurotrauma.* 2017;34(2):328–340.
9. Strain JF, Didehbani N, Spence J, et al. White matter changes and confrontation naming in retired aging National Football League athletes. *J Neurotrauma.* 2017;34(2):372–379.
10. McMillan TM, McSkimming P, Wainman-Lefley J, et al. Long-term health outcomes after exposure to repeated concussion in elite level: rugby union players. *J Neurol Neurosurg Psychiatry.* 2017;88(6):505–511.
11. Alosco ML, Jarnagin J, Tripodis Y, et al. Olfactory function and associated clinical correlates in former National Football League players. *J Neurotrauma.* 2017;34(4):772–780.

12. Solomon GS, Kuhn AW, Zuckerman SL, Casson IR, Viano DC, Lovell MR. Participation in pre-high school football and neurological, neuroradiological, and neuropsychological findings in later life: a study of 45 retired National Football League players. *Am J Sports Med.* 2016;44(5):1106–1115.
13. Multani N, Goswami R, Khodadadi M, et al. The association between white-matter tract abnormalities, and neuropsychiatric and cognitive symptoms in retired professional football players with multiple concussions. *J Neurol.* 2016;263(7):1332–1341.
14. Koerte IK, Mayinger M, Muehlmann M, et al. Cortical thinning in former professional soccer players. *Brain Imaging Behav.* 2016;10(3):792–798.
15. Gardner RC, Hess CP, Brus-Ramer M, et al. Cavum septum pellucidum in retired American pro-football players. *J Neurotrauma.* 2016;33(1):157–161.
16. Wright MJ, Woo E, Birath JB, et al. An index predictive of cognitive outcome in retired professional American football players with a history of sports concussion. *J Clin Exp Neuropsychol.* 2016;38(5):561–571.
17. Wilde EA, Hunter JV, Li X, et al. Chronic effects of boxing: diffusion tensor imaging and cognitive findings. *J Neurotrauma.* 2016;33(7):672–680.
18. Amen DG, Willeumier K, Omalu B, Newberg A, Raghavendra C, Raji CA. Perfusion neuroimaging abnormalities alone distinguish National Football League players from a healthy population. *J Alzheimers Dis.* 2016;53(1):237–241.
19. Hume PA, Theadom A, Lewis GN, et al. A comparison of cognitive function in former rugby union players compared with former non-contact-sport players and the impact of concussion history. *Sports Med.* 2017;47(6):1209–1220.
20. Vann Jones SA, Breakey RW, Evans PJ. Heading in football, long-term cognitive decline and dementia: evidence from screening retired professional footballers. *Br J Sports Med.* 2014;48(2):159–161.
21. Decq P, Gault N, Blandeau M, et al. Long-term consequences of recurrent sports concussion. *Acta Neurochir (Wien).* 2016;158(2):289–300.
22. Koerte IK, Hufschmidt J, Muehlmann M, et al. Cavum septi pellucidi in symptomatic former professional football players. *J Neurotrauma.* 2016;33(4):346–353.

23. Meehan WP III, Taylor AM, Berkner P, et al. Division III collision sports are not associated with neurobehavioral quality of life. *J Neurotrauma*. 2016;33(2):254–259.
24. Coughlin JM, Wang Y, Munro CA, et al. Neuroinflammation and brain atrophy in former NFL players: an in vivo multimodal imaging pilot study. *Neurobiol Dis*. 2015;74:58–65.
25. Stamm JM, Bourlas AP, Baugh CM, et al. Age of first exposure to football and later-life cognitive impairment in former NFL players. *Neurology*. 2015;84(11):1114–1120.
26. Koerte IK, Lin AP, Muehlmann M, et al. Altered neurochemistry in former professional soccer players without a history of concussion. *J Neurotrauma*. 2015;32(17):1287–1293.
27. Strain JF, Womack KB, Didehbani N, et al. Imaging correlates of memory and concussion history in retired National Football League athletes. *JAMA Neurol*. 2015;72(7):773–780.
28. Terry DP, Adams TE, Ferrara MS, Miller LS. fMRI hypoactivation during verbal learning and memory in former high school football players with multiple concussions. *Arch Clin Neuropsychol*. 2015;30(4):341–355.
29. Casson IR, Viano DC, Haacke EM, Kou Z, LeStrange DG. Is there chronic brain damage in retired NFL players? Neuroradiology, neuropsychology, and neurology examinations of 45 retired players. *Sports Health*. 2014;6(5):384–395.
30. Tremblay S, Henry LC, Bedetti C, et al. Diffuse white matter tract abnormalities in clinically normal ageing retired athletes with a history of sports-related concussions. *Brain*. 2014;137(pt 11):2997–3011.
31. Hart J Jr, Kraut MA, Womack KB, et al. Neuroimaging of cognitive dysfunction and depression in aging retired NFL players: a cross-sectional study. *JAMA Neurol*. 2013;70(3):326–335.
32. Hampshire A, MacDonald A, Owen AM. Hypoconnectivity and hyperfrontality in retired American football players. *Sci Rep*. 2013;3:2972.
33. Pearce AJ, Hoy K, Rogers MA, et al. The long-term effects of sports concussion on retired Australian football players: a study using transcranial magnetic stimulation. *J Neurotrauma*. 2014;31(13):1139–1145.
34. Seichepine DR, Stamm JM, Daneshvar DH, et al. Profile of self-reported problems with executive functioning in college and professional football players. *J Neurotrauma*. 2013;30(14):1299–1304.



35. Randolph C, Karantzoulis S, Guskiewicz K. Prevalence and characterization of mild cognitive impairment in retired National Football League players. *J Int Neuropsychol Soc.* 2013;19(8):873–880.
36. Tremblay S, De Beaumont L, Henry LC, et al. Sports concussions and aging: a neuroimaging investigation. *Cereb Cortex.* 2013;23(5):1159–1166.
37. Ford JH, Giovanello KS, Guskiewicz KM. Episodic memory in former professional football players with a history of concussion: an event-related functional neuroimaging study. *J Neurotrauma.* 2013;30(20):1683–1701.
38. Willeumier K, Taylor DV, Amen DG. Elevated body mass in National Football League players linked to cognitive impairment and decreased prefrontal cortex and temporal pole activity. *Transl Psychiatry.* 2012;2:e68.
39. Amen DG, Newberg A, Thatcher R, et al. Impact of playing American professional football on long-term brain function. *J Neuropsychiatry Clin Neurosci.* 2011;23(1):98–106.
40. Hinton PS, Johnstone B, Blaine E, Bodling A. Effects of current exercise and diet on late-life cognitive health of former college football players. *Phys Sportsmed.* 2011;39(3):11–22.
41. De Beaumont L, Théoret H, Mongeon D, et al. Brain function decline in healthy retired athletes who sustained their last sports concussion in early adulthood. *Brain.* 2009;132(pt 3):695–708.
42. Thornton AE, Cox DN, Whitfield K, Fouladi RT. Cumulative concussion exposure in rugby players: neurocognitive and symptomatic outcomes. *J Clin Exp Neuropsychol.* 2008;30(4):398–409.
43. Guskiewicz KM, Marshall SW, Bailes J, et al. Association between recurrent concussion and late-life cognitive impairment in retired professional football players. *Neurosurgery.* 2005;57(4):719–726.
44. Downs DS, Abwender D. Neuropsychological impairment in soccer athletes. *J Sports Med Phys Fitness.* 2002;42(1):103–107.
45. Murelius O, Haglund Y. Does Swedish amateur boxing lead to chronic brain damage? 4. A retrospective neuropsychological study. *Acta Neurol Scand.* 1991;83(1):9–13.
46. Casson IR, Siegel O, Sham R, Campbell EA, Tarlau M, DiDomenico A. Brain damage in modern boxers. *JAMA.* 1984;251(20):2663–2667.
